# Supplementary material
Source: ML conference proceedings conference paper supplement (https://openreview.net/forum?id=WaGvb7OzySA)
Supplement: supplementary_material [file attachment]

---

# CodeRL: Mastering Code Generation through Pretrained Models and Deep Reinforcement Learning Supplementary

---

Anonymous Author(s)

Affiliation

Address

email

## 1 A Overview of Critic Model

2 Figure 1 shows an overview of our critic model. In our CodeRL framework, besides the actor LM  
3 network  $\theta$ , we introduce a critic model that is trained as an error predictor and parameterized as  
4 a neural network with parameters  $\phi$ . The critic receives as inputs a problem description  $D$  and  
5 a corresponding synthetic program  $W^S$  sampled from the actor. The critic is required to output  
6 a prediction of the unit test outcome of the input program. We define 4 possible outcomes  $u$ :  
7 *CompileError*, *RuntimeError*, *FailedTest*, and *PassedTest*. The critic model is trained by minimizing  
8 the following loss:

$$\mathcal{L}_{critic}(\phi) = -\log p_{\phi}(u|W^s, D) \quad (1)$$

9 The ground-truth outcome of a synthetic sample is obtained by passing it to the unit tests correspond-  
10 ing to the problem. Note that since our critic model is applied in a supervised learning environment  
11 with available ground truth, we also use the training samples from the original dataset with ground  
12 truth output  $u = \textit{PassedTest}$  to train the critic.

13 The learned hidden state representations of program tokens when passed through the critic are then  
14 used to measure their return estimates for our RL optimization objective. The return estimates are  
15 incorporated as intermediate returns at decoding steps to compute the expected gradient of the actor  
16 network  $\nabla_{\theta} \mathcal{L}_{rl}(\theta)$ .

## 17 B Critic Sampling Procedure

18 Refer to Algorithm 1 for a step-by-step explanation of our critic sampling procedure.

## 19 C Additional Experimental Setup Details

20 **Pretraining Setup.** For CodeT5, we adopt the code-specific tokenizer as described by Wang et al.  
21 [2021]. Note that we employ 6 programming languages (PLs) in CodeSearchNet [Husain et al., 2019]  
22 (CSN) instead of 8 PLs in CodeT5 as C/C# datasets are not publicly available. We employ only the  
23 pretraining task of masked span prediction (MSP) in CodeT5 and hence, we do not have to parse  
24 programs into abstract syntax trees (ASTs) to obtain the identifier information. This preprocessing  
25 step was required in other original pretraining tasks like masked identifier prediction [Wang et al.,  
26 2021]. To further speed up training, we concatenate data samples to batch size 512 for pretraining  
27 with MSP and the resulting number of tokens is 1.1B.

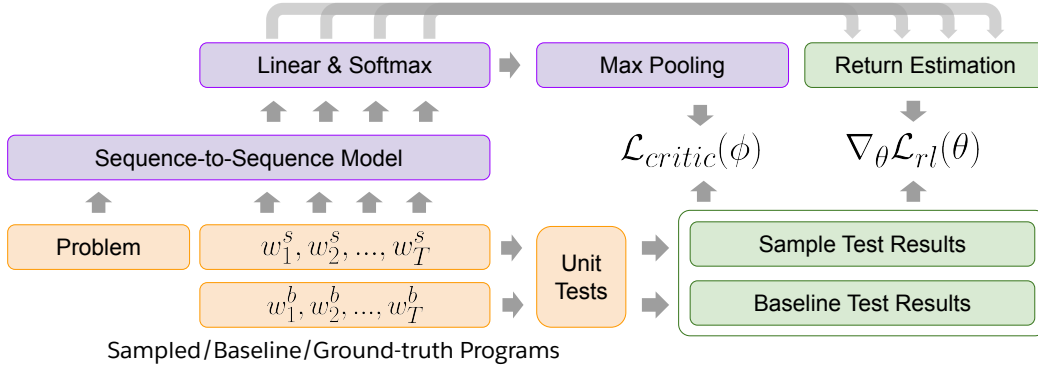

Figure 1: **Overview of our critic model:** The critic receives problem specifications and programs as inputs. For each program, the critic predicts one of four possible test outcomes:  $\{\text{CompileError}, \text{RuntimeError}, \text{FailedTest}, \text{PassedTest}\}$ . The learned hidden state representations are then used to estimate the returns of synthetic samples to finetune the actor network. To improve and stabilize the training process, baseline programs are used to compute relative return estimates.

28 **APPS Benchmark.** We follow the same preprocessing step as in [Hendrycks et al., 2021] to  
 29 formulate the input sequences from problem descriptions. APPS consists of 10,000 coding prob-  
 30 lems with a 50-50 train-test split. Each problem is accompanied by 23.2 correct Python programs  
 31 and 21.2 unit tests on average. The average length per problem is 293.2 words and the average  
 32 length per program is 18.0 lines. The dataset is categorized into three levels of difficulty: Introductory  
 33 (3639, train/test=2639/100), Interview (5000, train/test=2000/3000), and Competition (1361,  
 34 train/test=361/1000). Similarly to [Hendrycks et al., 2021], we employ the strict accuracy metric to  
 35 evaluate the functional correctness of a program, where it is counted as correct if it can pass all the  
 36 unit tests corresponding to the problem.

37 **MBPP Benchmark.** We additionally include another smaller and simpler Python program synthesis  
 38 dataset called MBPP [Austin et al., 2021] (Mostly Basic Programming Problems) for evaluation. The  
 39 dataset contains 974 instances with 374/90/500 instances for training/validation/testing respectively  
 40 and 10 reserved for few-shot learning. The problems are typically short, usually one sentence of  
 41 natural language descriptions each. Each problem is accompanied by 1 correct solution (6.8 lines  
 42 of code on average) and 3 unit tests in the form of `assert` statements for validating the functional  
 43 correctness. Unlike APPS, unit tests in MBPP are not hidden and are explicitly incorporated into  
 44 the source sequences for program synthesis models. This might encourage models to be overfitting  
 45 to these `assert` statements via hard-coding an if-expression very occasionally. However, for a  
 46 fair comparison with the baselines, we construct the source sequences in the same way as in prior  
 47 work. Specifically, we adopt the same prompt format as in [Austin et al., 2021] to prepare the input  
 48 sequence as: problem descriptions + “Your code should satisfy these tests:” + 3 `assert` statements.

49 **Finetuning Setup.** Following [Bahdanau et al., 2016], since our RL method is applied in a su-  
 50 pervised learning task, in addition to synthetic programs, we also use the ground-truth programs  
 51 of training samples to train the critic. These samples are considered perfect programs and always  
 52 have a label of *PassedTest*. To optimize the LM actor network, in practice, following previous work  
 53 [Bahdanau et al., 2016, Rennie et al., 2017, Wang et al., 2018], in each training optimization step, we  
 54 can simply approximate the expected gradient with a single sample  $W_s \sim p_{\theta}$ :

$$\nabla_{\theta} \mathcal{L}_{rl}(\theta) \approx -(r(W^s) - r(W^b)) \sum_t \hat{q}_{\phi}(w_t^s) \nabla_{\theta} \log p_{\theta}(w_t^s | w_{1:t-1}^s, D) \quad (2)$$

55 **Configurations.** For pretraining, we perform our experiments on a Kubernetes with 16 A100-40G  
 56 GPUs on Google Cloud Platform and the total pretraining duration is around 21 days. In the first  
 57 pretraining stage with MSP, we employ a corruption rate of 15%, a peak learning rate (LR) of  $2e-4$ ,

---

**Algorithm 1:** Critic sampling procedure to generate programs

---

**Input:** Problem  $D$ , Language model  $\theta$ , Critic model  $\phi$ **Output:** A set of  $N$  generated solution programs

```
1 begin
  /* step 1: generate program solutions by LM */
2  a set of output solutions  $S \leftarrow \emptyset$ 
3  for  $N$  times do
  |   /* use sampling decoding to generate programs */
4  |   Program  $\hat{W}_i \leftarrow \text{Sampling } p_\theta(W_i|D) \leftarrow \text{Sampling } p_\theta(w_t^i|w_{1:t-1}^i, D)$ 
5  |    $S \leftarrow S \cup \{\hat{W}_i\}$ 
  /* step 2: extract example unit tests from problem */
6  example unit tests  $\mathcal{I} \leftarrow \text{ExtractExampleInputOutput}(D)$ 
  /* step 3: filter for passed programs and pass to the critic
  |   model to select sub-sequences */
7  a set of filtered programs  $\mathcal{F} \leftarrow \emptyset$ 
8  for each generated program  $\hat{W}_i \in S$  do
9  |   Testoutcomes  $u_i \leftarrow \text{RunTests}(\hat{W}_i, \mathcal{I})$ 
10 |   if  $u_i = \text{"PassedTest"}$  then
11 |   |    $\mathcal{F} \leftarrow \mathcal{F} \cup \{\hat{W}_i\}$ 
  /* If no passed samples, return all current programs for
  |   evaluation */
12 if  $|\mathcal{F}| = 0$  then return  $S$ 
13 upsampling param  $N' = N/|\mathcal{F}|$ 
14 a set of output solutions  $S' \leftarrow \emptyset$ 
15 for each filtered program  $\hat{W}_i \in \mathcal{F}$  do
16 |   subsequence  $W_i^{sub} \leftarrow \text{Sampling } p_\phi(u_i = \text{PassedTest}|\hat{W}_i, D)$ 
17 |    $\leftarrow \text{Sampling } p_\phi(u_i = \text{PassedTest}|\hat{w}_{1:t-1}, D)$ 
  /* step 4: subsequence as seeds to regenerate programs */
18 |   length of subsequence  $m \leftarrow |W_i^{sub}|$ 
19 |   for  $N'$  times do
20 |   |    $\hat{W}_j \leftarrow \text{Sampling } p_\theta(W_j|W_i^{sub}, D) \leftarrow \text{Sampling } p_\theta(w_t^j|w_{m:t-1}^j, W_i^{sub}, D)$ 
21 |   |    $S' \leftarrow S' \cup \{\hat{W}_j\}$ 
  /* return the regenerated programs for evaluation */
22 return  $S'$ 
```

---

58 and a batch size of 2048. We pretrain on CSN for 150 epochs (10 days) and then on GCPY for  
59 10 epochs (5 days). For the second stage pretraining with NTP, we adopt a peak LR of 1e-4 and a  
60 batch size of 256, and pretrain for 10 epochs (6 days). We set the maximum length to 768 and 600  
61 for source and target sequences respectively for this objective. For all experiments, we employ an  
62 AdamW optimizer [Loshchilov and Hutter, 2019] with a 0.05 weight decay and a linear decay LR  
63 scheduler with a warmup step of 1000.

64 For finetuning on APPS, we adopt a batch size of 64 and warmup LR from 0 to 2e-5 for the first 500  
65 steps and polynomially (power=0.5) decay to 1e-5 until the end of 10 epochs, which takes around 30  
66 hours on one A100 GPU. We set the maximum source and target sequence length to 600 and 512  
67 respectively.

68 To train the critic model (either a GPT2-small or a CodeT5-base), we train the models with synthetic  
69 sampled programs for up to 10 epochs. We found that in this phase, the critic model usually converges  
70 quite earlier than the 10-epoch training limit. Once the critic model is trained, we continue to finetune

Table 1: **CodeT5 results on CodeXGLUE:** Code-to-Text generation results (smoothed BLEU-4) of CodeT5 pretrained with larger data, improved learning objectives, and larger model size

| Model        | Ruby         | JavaScript   | Go           | Python       | Java         | PHP          | Overall      |
|--------------|--------------|--------------|--------------|--------------|--------------|--------------|--------------|
| RoBERTa      | 11.17        | 11.90        | 17.72        | 18.14        | 16.47        | 24.02        | 16.57        |
| CodeBERT     | 12.16        | 14.90        | 18.07        | 19.06        | 17.65        | 25.16        | 17.83        |
| DOBF         | -            | -            | -            | 18.24        | 19.05        | -            | -            |
| PLBART       | 14.11        | 15.56        | 18.91        | 19.30        | 18.45        | 23.58        | 18.32        |
| CoTexT       | 14.02        | 14.96        | 18.86        | 19.73        | 19.06        | 24.58        | 18.55        |
| CodeT5-small | 14.87        | 15.32        | 19.25        | 20.04        | 19.92        | 25.46        | 19.14        |
| CodeT5-base  | 15.24        | 16.16        | 19.56        | 20.01        | 20.31        | 26.03        | 19.55        |
| CodeT5-large | <b>15.58</b> | <b>16.17</b> | <b>19.69</b> | <b>20.57</b> | <b>20.74</b> | <b>26.49</b> | <b>19.87</b> |

Table 2: **CodeT5 results on CodeXGLUE:** Text-to-Code generation results of CodeT5 pretrained with larger data, improved learning objectives, and larger model size

| Model           | EM           | BLEU-4       | CodeBLEU     |
|-----------------|--------------|--------------|--------------|
| GPT-2           | 17.35        | 25.37        | 29.69        |
| CodeGPT-2       | 18.25        | 28.69        | 32.71        |
| CodeGPT-adapted | 20.10        | 32.79        | 35.98        |
| PLBART          | 18.75        | 36.69        | 38.52        |
| CoTexT          | 20.10        | 37.40        | 40.14        |
| UniXcoder       | 22.60        | 38.23        | -            |
| CodeT5-small    | 21.55        | 38.13        | 41.39        |
| CodeT5-base     | 22.30        | 40.73        | 43.20        |
| CodeT5-large    | <b>22.65</b> | <b>42.66</b> | <b>45.08</b> |

Table 3: **CodeT5 results on CodeXGLUE:** Code-to-Code generation results of CodeT5 pretrained with larger data, improved learning objectives, and larger model size

| Model           | Java to C#   |              | C# to Java   |              | Refine Small |              | Refine Medium |              |
|-----------------|--------------|--------------|--------------|--------------|--------------|--------------|---------------|--------------|
|                 | BLEU-4       | EM           | BLEU-4       | EM           | BLEU-4       | EM           | BLEU-4        | EM           |
| Naive copy      | 18.54        | 0.00         | 18.69        | 0.00         | 78.06        | 0.00         | 90.91         | 0.00         |
| Robortta (code) | 77.46        | 56.10        | 71.99        | 57.90        | 77.30        | 15.90        | 90.07         | 4.10         |
| CodeBERT        | 79.92        | 59.00        | 72.14        | 58.00        | 77.42        | 16.40        | 91.07         | 5.20         |
| GraphCodeBERT   | 80.58        | 59.40        | 72.64        | 58.80        | <b>80.02</b> | 17.30        | <b>91.31</b>  | 9.10         |
| PLBART          | 83.02        | 64.60        | 78.35        | 65.00        | 77.02        | 19.21        | 88.50         | 8.98         |
| CoTexT          | -            | -            | -            | -            | 77.79        | 21.03        | 88.40         | 13.11        |
| NSEdit          | -            | -            | -            | -            | 71.06        | <b>24.04</b> | 85.72         | 13.87        |
| CodeT5-small    | 82.98        | 64.10        | 79.10        | 65.60        | 76.23        | 19.06        | 89.20         | 10.92        |
| CodeT5-base     | <b>84.03</b> | 65.90        | <b>79.87</b> | 66.90        | 77.43        | 21.61        | 87.64         | 13.96        |
| CodeT5-large    | 83.56        | <b>66.00</b> | 79.77        | <b>67.00</b> | 77.38        | 21.70        | 89.22         | <b>14.76</b> |

71 the actor language model for 10 more epochs using both the conventional NTP loss and RL-based  
72 loss.

73 For MBPP, in finetuning experiments with CodeT5, due to its small training set, we finetune the  
74 models for 60 epochs with a constant LR of  $2e-5$  and a batch size of 32, which takes less than 30  
75 mins on one A100. We set its maximum source and target length to 382 and 306 respectively.

76 **Critic Sampling.** Note that in CS, many rounds of regeneration can be run to keep improving the  
77 output programs. However, in practice, we found that one round of regeneration is sufficient to obtain  
78 good programs. In the initial generation, if no samples pass example unit tests, we do not apply critic  
79 sampling and simply use all available programs for evaluation.

Table 4: **Ablation results on MBPP:** Ablation results of CodeRL with different CodeT5 model variants with different sizes, pretraining data and objectives on MBPP. CodeT5<sup>†</sup> is finetuned on APPS and evaluated on MBPP in a zero-shot setting.

| Model                    | Size | Data    | Objective | <i>pass@80</i> | <i>pass@1000</i> |
|--------------------------|------|---------|-----------|----------------|------------------|
| GPT finetuned results    |      |         |           |                |                  |
| GPT                      | 224M | Web Doc | LM        | 7.2            | -                |
| GPT                      | 422M | Web Doc | LM        | 12.6           | -                |
| GPT                      | 1B   | Web Doc | LM        | 22.4           | -                |
| GPT                      | 4B   | Web Doc | LM        | 33.0           | -                |
| GPT                      | 8B   | Web Doc | LM        | 40.6           | -                |
| GPT                      | 68B  | Web Doc | LM        | 53.6           | -                |
| GPT                      | 137B | Web Doc | LM        | 61.4           | -                |
| CodeT5 finetuned results |      |         |           |                |                  |
| CodeT5                   | 60M  | CSN     | MSP       | 19.2           | 36.2             |
| CodeT5                   | 220M | CSN     | MSP       | 24.0           | 42.8             |
| CodeT5                   | 770M | CSN     | MSP       | 32.4           | 47.8             |
| CodeT5                   | 770M | +GCPY   | MSP       | 34.6           | 51.6             |
| CodeT5                   | 770M | +GCPY   | +NTP      | 46.8           | 66.2             |
| CodeRL zero-shot results |      |         |           |                |                  |
| CodeT5 <sup>†</sup>      | 770M | +GCPY   | +NTP      | 60.2           | 78.4             |
| +CodeRL                  | 770M | +GCPY   | +NTP      | 63.0           | 81.8             |

## 80 D Additional Experimental Results

### 81 D.1 CodeXGLUE Benchmark Results

82 To validate the effectiveness of our simplified pretraining strategies of CodeT5-large, we extensively  
 83 evaluate it on a variety of generation tasks in CodeXGLUE [Lu et al., 2021], including code-to-text  
 84 generation (i.e. summarization, see Table 1), text-to-code generation (see Table 2), and code-to-code  
 85 generation (i.e., code translation and code refinement, see Table 3). Different from APPS [Hendrycks  
 86 et al., 2021] and MBPP [Austin et al., 2021], we follow the default similarity-based evaluation  
 87 metrics in the CodeXGLUE benchmark, including BLEU [Papineni et al., 2002] and CodeBLEU  
 88 [Ren et al., 2020], and exact match (EM) scores. Table 1, 2, and 3 show that our simplified pretrained  
 89 CodeT5-large sets new SOTA results on a large majority of the tasks, and hence, can be served as a  
 90 better foundation model for other code-related generation tasks. Note that in these experiments, we  
 91 employ the conventional finetuning objective with  $\mathcal{L}_{ce}$  and there might be potential to improve the  
 92 performance further with our CodeRL framework.

### 93 D.2 MBPP Benchmark Results

94 Following Austin et al. [2021], we adopt temperature sampling to generate multiple candidate  
 95 solutions. We empirically find that CodeT5 benefits from a higher temperature of 1.2 (less greedy  
 96 decoding or more diverse) than their GPT’s temperature of 0.5 on this benchmark.

97 Table 4 reports the *pass@80* and *pass@1000* results for both finetuned and zero-shot settings. For  
 98 baselines, we compared with GPT models with sizes ranging from 224M to 137B [Austin et al.,  
 99 2021], which are pretrained on 2.93B web documents (13.8M containing source code) using standard  
 100 language modeling objective. Results of GPT models are obtained from the original authors. From  
 101 the comparison among various CodeT5 variants, we again confirm that larger model sizes and  
 102 pretraining data, and better pretraining objective of NTP all lead to a performance boost. Particularly,  
 103 our CodeT5-770M yields a *pass@80* of 46.8%, surpassing GPT-8B’s 40.6% with a much smaller  
 104 model size. In addition, we find CodeT5 models finetuned on APPS can achieve a surprisingly good  
 105 zero-shot performance on MBPP with a *pass@80* of 60.2% and further improved to 63.0% with  
 106 the help of CodeRL, which even outperforms the largest GPT-137B’s performance of 61.4%. This  
 107 indicates APPS is a comprehensive program synthesis benchmark and CodeT5+CodeRL models  
 108 trained on it are able to generalize to other simpler coding tasks. If we further increase the budget of

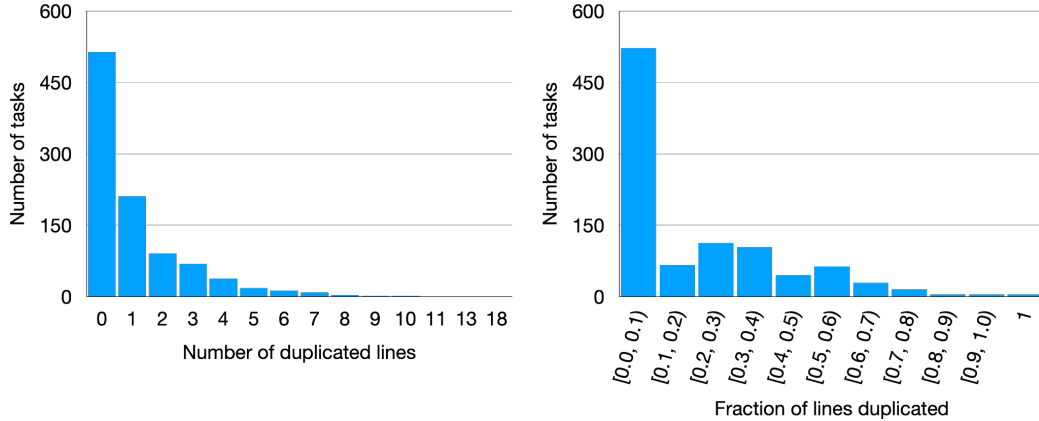

Figure 2: **Analysis of duplicated lines between MBPP and APPS:** The overlap of data between APPS and MBPP appears to be minimal, with only 12.6% MBPP programs with > 50% lines duplicated in APPS training data.

109 attempts up to 1000, all models witness a consistent and significant boost in solving rate, especially  
 110 our CodeT5+CodeRL yielding a new SOTA result of 81.8% *pass@1000*.

111 A common concern about transfer learning is that the source (APPS) and target (MBPP) tasks might  
 112 overlap in their training data, which could result in the source model tending to memorize these  
 113 substantially similar data when applied to the target task. To address this concern, we analyze  
 114 how many lines of code appear in both the training set of APPS and the programs of MBPP  
 115 following Austin et al. [2021]. For this analysis, we discard code comments and normalize the  
 116 whitespaces for each line, and then exclude lines that appear more than twice anywhere in MBPP, as  
 117 these are likely to be common Python keywords such as `return` and `break`.

118 Figure 2 illustrates the number of absolute duplicated lines (Left) and the relative fraction of duplicated  
 119 lines (Right) in the MBPP programs. As can be seen, the overlap between APPS and MBPP seems to  
 120 be minimal. Only 12.6% MBPP programs have more than half of their lines matched somewhere in  
 121 the APPS training data. Besides, more than half (514 out of 974) of programs have a zero overlap and  
 122 90.9% have only no more than 3 lines overlapping with the APPS training set. If we further require  
 123 the lines to be consecutive, there are no more than 2 consecutive duplicated lines.

### 124 D.3 APPS Benchmark Results on Competition-level Tasks

125 Figure 3 shows the results of *pass@k* and *n@k* with *k* ranging from 1 to 200 and *n* = {1, 5}, for  
 126 CodeRL+CodeT5 and CodeT5 only. We choose to investigate a subset of the APPS test split, which  
 127 contains the test samples of the highest difficulty level (i.e. competition programming tasks). Since  
 128 CodeRL is model-agnostic, we also integrate it with GPT-J [Wang and Komatsuzaki, 2021] and report  
 129 the results. To focus on the impact of our RL optimization, during test time, we compare models  
 130 using only nucleus sampling and without the CS procedure. Figure 3 shows that the performance  
 131 gains are quite consistent on both GPT-J and CodeT5. In particular, as *k* increases, the performance  
 132 gain of CodeRL is more significant on both GPT-J and CodeT5 models. We attribute these gains to  
 133 the CodeRL learning objective  $\mathcal{L}_{rl}$  that encourages models to explore code solutions drawn from the  
 134 model’s sampling distribution. During test time with an increasing *k* sampling budget, models are  
 135 allowed to generate diverse code solutions and the impact of  $\mathcal{L}_{rl}$  becomes more significant.

### 136 D.4 CodeT5 Ablation by Training Epochs

137 Figure 4 shows the performance of CodeT5 model variants by finetuning epochs and by difficulty  
 138 levels of programming tasks. Note that in these experiments, we only need to compare among  
 139 CodeT5 model variants by pretraining strategies, and hence, only engage  $\mathcal{L}_{ce}$  (imitation learning) in

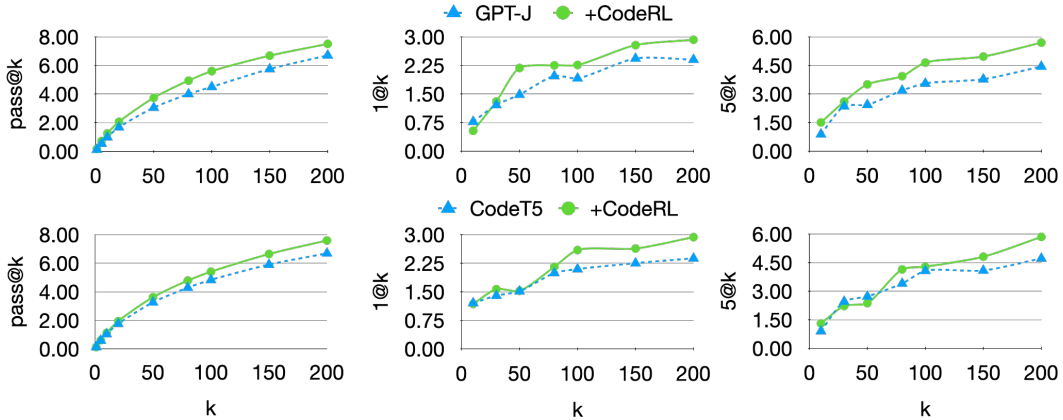

Figure 3: **Results on APPS competition-level test samples:** We investigate the most challenging programming problem tasks, i.e. competition level, in the APPS benchmark. Integrating CodeRL with both CodeT5 and GPT-J, we observe good performance improvement across  $pass@k$  and  $n@k$  metrics, with increasing performance gains as  $k$  increases.

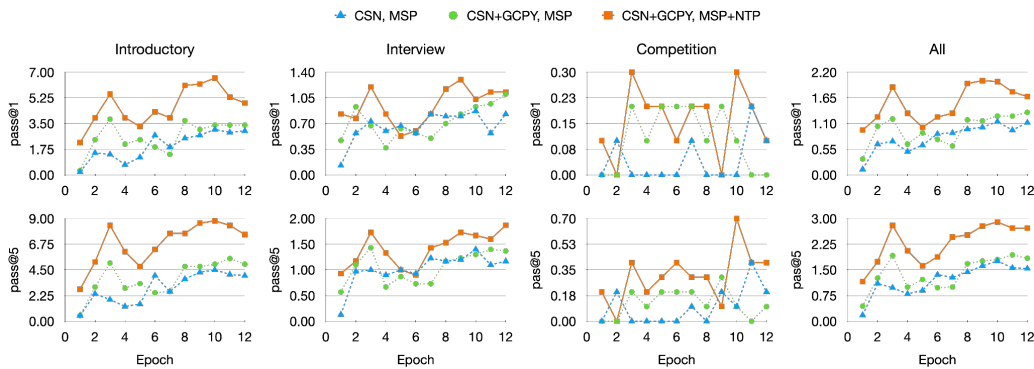

Figure 4: **Ablation results by finetuning epochs:** We report the finetuning progress of CodeT5-770M models that are pretrained on different configurations by pretraining data and pretraining tasks. CSN: CodeSearchNet, GCPY: Github Code Python, MSP: Masked Span Prediction, NTP: Next Token Prediction. All models are finetuned only with  $\mathcal{L}_{ce}$  on APPS.

140 the finetuning stage on APPS. Consistent with our prior analysis (see Section ?? of the main paper),  
 141 enhancing both pretraining data (with larger data of GCPY) and pretraining objectives (with NTP  
 142 objective) improves model performance across training epochs in general. Moreover, as noted by our  
 143 analysis of learning objectives, only using  $\mathcal{L}_{ce}$  often leads to overfitting performance, typically after  
 144 epoch 10 in our case. Hence, to further finetune large-scale LMs, we recommend adopting our RL  
 145 objective  $\mathcal{L}_{rl}$  to utilize synthetic training samples and avoid overfitting models.

#### 146 D.5 Impacts of CodeRL on Program Quality by Unit Test Signals

147 Figure 5 demonstrates the average percentages of generated programs by their test signals. Specifically,  
 148 we use CodeT5 or CodeRL+CodeT5 to generate programs and randomly select 200 generated  
 149 programs per test sample in the APPS test split. We pass programs to either example unit tests or  
 150 hidden unit tests corresponding to the problem and group the output programs by their output signals,  
 151 including CompileError, RuntimeError, FailedTest, and PassedTest. We observe that integrating  
 152 CodeRL can increase the likelihood that a program can pass unit tests, and reduces the likelihood  
 153 that it fails one or more unit tests, or whether it contains compiling or runtime errors. However, we  
 154 note that there are significant gaps in performance by test signals between example unit tests and  
 155 hidden unit tests. This observation suggests that example tests are not as comprehensive as hidden

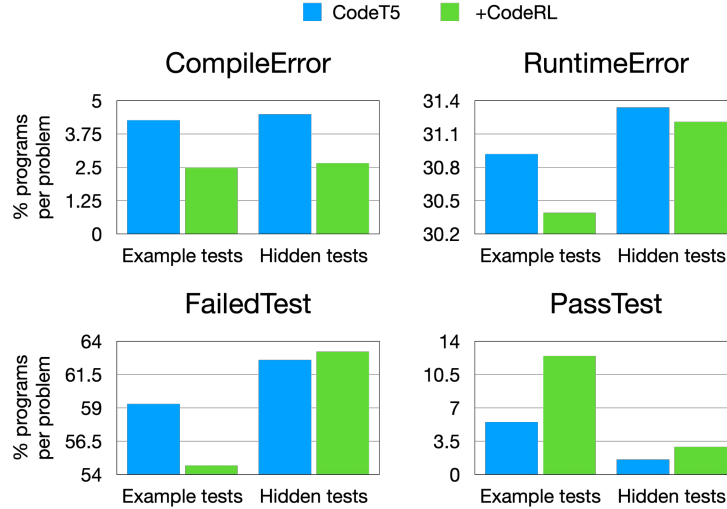

Figure 5: **Qualitative results of CodeT5 and CodeT5+CodeRL:** We generate 200 programs per test sample and report the % programs per sample by their unit test signals, including CompileError, RuntimeError, FailedTest, and PassedTest.

156 tests and hence, applying our CS procedure might lead to false positive samples for regeneration. We  
 157 recommend additional methods to improve example unit tests, such as through data augmentation by  
 158 mutating input/output pairs [Austin et al., 2021].

## 159 D.6 Example Generated Programs and Qualitative Analysis

160 Figure 6 to 8 show examples of programming problems from the APPS benchmark and corresponding  
 161 programs generated by CodeT5 variants. Specifically, based on the same foundation pretrained  
 162 CodeT5 (pretrained with GCPY data and NTP objective), we compare the CodeT5 model that is  
 163 finetuned by  $\mathcal{L}_{ce}$  only and another model that follows our CodeRL framework. In CodeRL+CodeT5,  
 164 we further show programs before and after applying the CS procedure. The example programs  
 165 show that applying CodeRL can improve the quality of generated programs and the CS procedure  
 166 further improves the functional correctness of the programs. For instance, in Figure 8, CodeT5 model  
 167 misunderstands the problem and focuses on finding the greatest common divisor between  $a$  and  $b$   
 168 only. Instead, the CodeRL model avoids this mistake and tackles the problem based on the *factorials*  
 169 of  $a$  and  $b$ . In Figure 7, we note that the CS procedure improves the program by reordering the `elif`  
 170 code blocks. The resulting program is more correct and is able to pass all hidden unit tests.

171 We also found that CodeRL can improve the efficiency of the programs, an important quality in  
 172 complex programming problems. For instance, in the interview-level programs in Figure 8, we note  
 173 that without applying CS, the generated program is functionally correct but fails during execution due  
 174 to a timeout error. Applying the CS procedure can condition models on parts of the prior program and  
 175 (re)generates new tokens to produce a more efficient program. Hence, the resulting final program is  
 176 able to pass all hidden unit tests (including tests with extremely large values) without timeout errors.

## 177 References

- 178 J. Austin, A. Odena, M. Nye, M. Bosma, H. Michalewski, D. Dohan, E. Jiang, C. Cai, M. Terry,  
 179 Q. Le, et al. Program synthesis with large language models. *arXiv preprint arXiv:2108.07732*,  
 180 2021.
- 181 D. Bahdanau, P. Brakel, K. Xu, A. Goyal, R. Lowe, J. Pineau, A. Courville, and Y. Bengio. An  
 182 actor-critic algorithm for sequence prediction. *arXiv preprint arXiv:1607.07086*, 2016.



| Input Problem                                                                                                                                                                                                                                                                                                                                                                                                                                                                                                                                                                                                                                                                                                                                                                                                                                               | Example Unit Tests                                                                                             | Hidden Unit Tests                                                                          |
|-------------------------------------------------------------------------------------------------------------------------------------------------------------------------------------------------------------------------------------------------------------------------------------------------------------------------------------------------------------------------------------------------------------------------------------------------------------------------------------------------------------------------------------------------------------------------------------------------------------------------------------------------------------------------------------------------------------------------------------------------------------------------------------------------------------------------------------------------------------|----------------------------------------------------------------------------------------------------------------|--------------------------------------------------------------------------------------------|
| <p>QUESTION:</p> <p>There is a right triangle ABC with <math>\angle ABC=90^\circ</math>. Given the lengths of the three sides,  AB , BC  and  CA , find the area of the right triangle ABC. It is guaranteed that the area of the triangle ABC is an integer.</p> <p>-----Constraints-----</p> <ul style="list-style-type: none"> <li>- <math>1 \leq  AB ,  BC ,  CA  \leq 100</math></li> <li>- All values in input are integers.</li> <li>- The area of the triangle ABC is an integer.</li> </ul> <p>-----Input-----</p> <p>Input is given from Standard Input in the following format:<br/> AB   BC   CA </p> <p>-----Output-----</p> <p>Print the area of the triangle ABC.</p> <p>-----Sample Input-----</p> <p>3 4 5</p> <p>-----Sample Output-----</p> <p>6</p> <p>This triangle has an area of 6.<br/>Use Standard Input format</p> <p>ANSWER:</p> | <p>Input: 3 4 5</p> <p>Output: 6</p>                                                                           | <p>Input: 5 12 13</p> <p>Output: 30</p> <p>Input: 24 7 25</p> <p>Output: 84</p> <p>...</p> |
|                                                                                                                                                                                                                                                                                                                                                                                                                                                                                                                                                                                                                                                                                                                                                                                                                                                             | <b>Ground-truth Program</b>                                                                                    |                                                                                            |
|                                                                                                                                                                                                                                                                                                                                                                                                                                                                                                                                                                                                                                                                                                                                                                                                                                                             | <pre>1 L = list(map(int, input().split())) 2 sortL = sorted(L) 3 ans = L[0] * L[1] / 2 4 print(int(ans))</pre> |                                                                                            |
|                                                                                                                                                                                                                                                                                                                                                                                                                                                                                                                                                                                                                                                                                                                                                                                                                                                             | <b>CodeT5 Output Program</b>                                                                                   |                                                                                            |
|                                                                                                                                                                                                                                                                                                                                                                                                                                                                                                                                                                                                                                                                                                                                                                                                                                                             | <pre>1 ab, bc, ca = map(int, input().split()) 2 print((ab*bc*ca))</pre>                                        |                                                                                            |
|                                                                                                                                                                                                                                                                                                                                                                                                                                                                                                                                                                                                                                                                                                                                                                                                                                                             | <p>Example tests: <b>Failed</b></p> <p>Hidden tests: <b>Failed</b></p>                                         |                                                                                            |
|                                                                                                                                                                                                                                                                                                                                                                                                                                                                                                                                                                                                                                                                                                                                                                                                                                                             | <b>CodeRL+CodeT5 Output Program (before CS)</b>                                                                |                                                                                            |
|                                                                                                                                                                                                                                                                                                                                                                                                                                                                                                                                                                                                                                                                                                                                                                                                                                                             | <pre>1 a, b, c = map(int, input().split()) 2 x = (a+b+c)/2 3 print(x)</pre>                                    |                                                                                            |
|                                                                                                                                                                                                                                                                                                                                                                                                                                                                                                                                                                                                                                                                                                                                                                                                                                                             | <p>Example tests: <b>Passed</b></p> <p>Hidden tests: <b>Failed</b></p>                                         |                                                                                            |
|                                                                                                                                                                                                                                                                                                                                                                                                                                                                                                                                                                                                                                                                                                                                                                                                                                                             | <b>CodeRL+CodeT5 Output Program (after CS)</b>                                                                 |                                                                                            |
|                                                                                                                                                                                                                                                                                                                                                                                                                                                                                                                                                                                                                                                                                                                                                                                                                                                             | <pre>1 a, b, c = map(int, input().split()) 2 x = (a+b+c)/2 3 y = (a+b-c)/2 4 print((x*y))</pre>                |                                                                                            |
|                                                                                                                                                                                                                                                                                                                                                                                                                                                                                                                                                                                                                                                                                                                                                                                                                                                             | <p>Example tests: <b>Passed</b></p> <p>Hidden tests: <b>Passed</b></p>                                         |                                                                                            |

Figure 6: **An example synthesis task from the APPS benchmark and corresponding programs generated by CodeT5 variants:** Without the CS generation procedure, CodeRL+CodeT5 model can generate programs that pass all example tests but fail hidden tests. With the CS generation procedure, the model can condition on prior programs and generate a better program that passes all hidden tests.

- 183 D. Hendrycks, S. Basart, S. Kadavath, M. Mazeika, A. Arora, E. Guo, C. Burns, S. Puranik, H. He,  
184 D. Song, and J. Steinhardt. Measuring coding challenge competence with apps. *NeurIPS*, 2021.
- 185 H. Husain, H. Wu, T. Gazit, M. Allamanis, and M. Brockschmidt. Codesearchnet challenge:  
186 Evaluating the state of semantic code search. *CoRR*, abs/1909.09436, 2019.
- 187 I. Loshchilov and F. Hutter. Decoupled weight decay regularization. In *ICLR (Poster)*. OpenRe-  
188 view.net, 2019.
- 189 S. Lu, D. Guo, S. Ren, J. Huang, A. Svyatkovskiy, A. Blanco, C. B. Clement, D. Drain, D. Jiang,  
190 D. Tang, G. Li, L. Zhou, L. Shou, L. Zhou, M. Tufano, M. Gong, M. Zhou, N. Duan, N. Sundaresan,  
191 S. K. Deng, S. Fu, and S. Liu. Codexglue: A machine learning benchmark dataset for code  
192 understanding and generation. In *NeurIPS Datasets and Benchmarks*, 2021.
- 193 K. Papineni, S. Roukos, T. Ward, and W.-J. Zhu. Bleu: a method for automatic evaluation of machine  
194 translation. In *Proceedings of the 40th annual meeting on association for computational linguistics*,  
195 pages 311–318. Association for Computational Linguistics, 2002.
- 196 S. Ren, D. Guo, S. Lu, L. Zhou, S. Liu, D. Tang, N. Sundaresan, M. Zhou, A. Blanco, and S. Ma.  
197 Codebleu: a method for automatic evaluation of code synthesis. *arXiv preprint arXiv:2009.10297*,  
198 2020.

| Input Problem                                                                                                                                                                                                                                                                                                                                                                                                                                                                                                                                                                                                                                                                                                                                                                                                                                                                                                                                                                                                                                                                                                                                                                                                                                       | Example Unit Tests                                                                                                                                                                                                                                                                                                                                                                                                                                                                                                                                                                                                                                       | Hidden Unit Tests                                                                                                                                                                                                                                                                                                                                                                                                                                                                                                                                                                                                                              |
|-----------------------------------------------------------------------------------------------------------------------------------------------------------------------------------------------------------------------------------------------------------------------------------------------------------------------------------------------------------------------------------------------------------------------------------------------------------------------------------------------------------------------------------------------------------------------------------------------------------------------------------------------------------------------------------------------------------------------------------------------------------------------------------------------------------------------------------------------------------------------------------------------------------------------------------------------------------------------------------------------------------------------------------------------------------------------------------------------------------------------------------------------------------------------------------------------------------------------------------------------------|----------------------------------------------------------------------------------------------------------------------------------------------------------------------------------------------------------------------------------------------------------------------------------------------------------------------------------------------------------------------------------------------------------------------------------------------------------------------------------------------------------------------------------------------------------------------------------------------------------------------------------------------------------|------------------------------------------------------------------------------------------------------------------------------------------------------------------------------------------------------------------------------------------------------------------------------------------------------------------------------------------------------------------------------------------------------------------------------------------------------------------------------------------------------------------------------------------------------------------------------------------------------------------------------------------------|
| <p><b>QUESTION:</b><br/>Allen has a LOT of money. He has \$n\$ dollars in the bank. For security reasons, he wants to withdraw it in cash (we will not disclose the reasons here). The denominations for dollar bills are \$1\$, \$5\$, \$10\$, \$20\$, \$100\$. What is the minimum number of bills Allen could receive after withdrawing his entire balance?</p> <p>----Input----</p> <p>The first and only line of input contains a single integer \$n\$ (\$1 \le n \le 10^9\$).</p> <p>----Output----</p> <p>Output the minimum number of bills that Allen could receive.</p> <p>----Examples----</p> <p>Input<br/>125</p> <p>Output<br/>3</p> <p>Input<br/>43</p> <p>Output<br/>5</p> <p>Input<br/>1000000000</p> <p>Output<br/>10000000</p> <p>----Note----</p> <p>In the first sample case, Allen can withdraw this with a \$100\$ dollar bill, a \$20\$ dollar bill, and a \$5\$ dollar bill. There is no way for Allen to receive \$125\$ dollars in one or two bills.</p> <p>In the second sample case, Allen can withdraw two \$20\$ dollar bills and three \$1\$ dollar bills.</p> <p>In the third sample case, Allen can withdraw \$1000000000\$ (ten million!) \$100\$ dollar bills.<br/>Use Standard Input format</p> <p>ANSWER:</p> | <p><b>Example Unit Tests</b></p> <p>Input: 125<br/>Output: 3</p> <p>Input: 43<br/>Output: 5<br/>...</p>                                                                                                                                                                                                                                                                                                                                                                                                                                                                                                                                                  | <p><b>Hidden Unit Tests</b></p> <p>Input: 74<br/>Output: 8</p> <p>Input: 82655<br/>Output: 830<br/>...</p>                                                                                                                                                                                                                                                                                                                                                                                                                                                                                                                                     |
|                                                                                                                                                                                                                                                                                                                                                                                                                                                                                                                                                                                                                                                                                                                                                                                                                                                                                                                                                                                                                                                                                                                                                                                                                                                     | <p><b>Ground-truth Program</b></p> <pre> 1 n = int(input()) 2 3 ans = 0 4 ans += n//100 5 n %= 100 6 ans += (n // 20) 7 n %= 20 8 ans += n //10 9 n %= 10 10 ans += n//5 11 n%= 5 12 ans += n//1 13 14 print(ans) </pre>                                                                                                                                                                                                                                                                                                                                                                                                                                 | <p><b>CodeT5 Output Program</b></p> <pre> 1 n = int(input()) 2 3 a = defaultdict(int) 4 5 for i in range(1, 101): 6     a[i] = n // i 7     n = n % i 8 9 ans = 0 10 for i in range(1, 101): 11     if n &lt; a[i]: 12         ans += a[i] 13         n -= a[i] 14 15 print(ans) </pre>                                                                                                                                                                                                                                                                                                                                                        |
|                                                                                                                                                                                                                                                                                                                                                                                                                                                                                                                                                                                                                                                                                                                                                                                                                                                                                                                                                                                                                                                                                                                                                                                                                                                     | <p><b>Example tests: Passed</b><br/><b>Hidden tests: Passed</b></p>                                                                                                                                                                                                                                                                                                                                                                                                                                                                                                                                                                                      | <p><b>Example tests: Failed</b><br/><b>Hidden tests: Failed</b></p>                                                                                                                                                                                                                                                                                                                                                                                                                                                                                                                                                                            |
|                                                                                                                                                                                                                                                                                                                                                                                                                                                                                                                                                                                                                                                                                                                                                                                                                                                                                                                                                                                                                                                                                                                                                                                                                                                     | <p><b>CodeRL+CodeT5 Output Program (before CS)</b></p> <pre> 1 def main(): 2     n = int(input()) 3     cnt = 0 4     while n &gt; 0: 5         if n % 100 == 0: 6             n -= 100 7             cnt += 1 8         elif n % 20 == 0: 9             n -= 20 10            cnt += 1 11            elif n % 5 == 0: 12                n -= 5 13                cnt += 1 14            elif n % 10 == 0: 15                n -= 10 16                cnt += 1 17            elif n &gt; 0: 18                n -= 1 19                cnt += 1 20            print(cnt) 21 22 23 def __starting_point(): 24     main() 25 26 __starting_point() </pre> | <p><b>CodeRL+CodeT5 Output Program (after CS)</b></p> <pre> 1 def main(): 2     n = int(input()) 3     cnt = 0 4     while n &gt; 0: 5         if n % 100 == 0: 6             n -= 100 7             cnt += 1 8         elif n % 20 == 0: 9             n -= 20 10            cnt += 1 11            elif n % 10 == 0: 12                n -= 10 13                cnt += 1 14            elif n % 5 == 0: 15                n -= 5 16                cnt += 1 17            else: 18                n -= 1 19                cnt += 1 20            print(cnt) 21 22 23 def __starting_point(): 24     main() 25 26 __starting_point() </pre> |
|                                                                                                                                                                                                                                                                                                                                                                                                                                                                                                                                                                                                                                                                                                                                                                                                                                                                                                                                                                                                                                                                                                                                                                                                                                                     | <p><b>Example tests: Passed</b><br/><b>Hidden tests: Failed</b></p>                                                                                                                                                                                                                                                                                                                                                                                                                                                                                                                                                                                      | <p><b>Example tests: Passed</b><br/><b>Hidden tests: Passed</b></p>                                                                                                                                                                                                                                                                                                                                                                                                                                                                                                                                                                            |

Figure 7: An example synthesis task from the APPS benchmark and corresponding programs generated by CodeT5 variants: Without the CS generation procedure, CodeRL+CodeT5 model can generate programs that pass all example tests but fail hidden tests, especially those of corner cases. With the CS generation procedure, the model can condition on prior programs and refine the code. Specifically, we observe the model can simply reorder the `elif` blocks between line 11 and 15 to fix the error. The resulting program is functionally correct and passes all hidden tests.

- 199 S. J. Rennie, E. Marcheret, Y. Mroueh, J. Ross, and V. Goel. Self-critical sequence training for image  
200 captioning. In *Proceedings of the IEEE conference on computer vision and pattern recognition*,  
201 pages 7008–7024, 2017.
- 202 B. Wang and A. Komatsuzaki. GPT-J-6B: A 6 Billion Parameter Autoregressive Language Model.  
203 <https://github.com/kingoflolz/mesh-transformer-jax>, May 2021.
- 204 X. Wang, W. Chen, J. Wu, Y.-F. Wang, and W. Y. Wang. Video captioning via hierarchical rein-  
205 forcement learning. In *Proceedings of the IEEE Conference on Computer Vision and Pattern  
206 Recognition*, pages 4213–4222, 2018.
- 207 Y. Wang, W. Wang, S. R. Joty, and S. C. H. Hoi. Codet5: Identifier-aware unified pre-trained  
208 encoder-decoder models for code understanding and generation. In *EMNLP (1)*, pages 8696–8708.

| Input Problem                                                                                                                                                                                                                                                                                                                                                                                                                                                                                                                                                                                                                                                                                                                                                                                                                                                                                                                                                                                                                                                                                                                                                                                                                                                                                                                                                                                                                                                                                                                                                                                                                                                                                                                                                                                                                                                          | Example Unit Tests                            | Hidden Unit Tests                                                                                                    |
|------------------------------------------------------------------------------------------------------------------------------------------------------------------------------------------------------------------------------------------------------------------------------------------------------------------------------------------------------------------------------------------------------------------------------------------------------------------------------------------------------------------------------------------------------------------------------------------------------------------------------------------------------------------------------------------------------------------------------------------------------------------------------------------------------------------------------------------------------------------------------------------------------------------------------------------------------------------------------------------------------------------------------------------------------------------------------------------------------------------------------------------------------------------------------------------------------------------------------------------------------------------------------------------------------------------------------------------------------------------------------------------------------------------------------------------------------------------------------------------------------------------------------------------------------------------------------------------------------------------------------------------------------------------------------------------------------------------------------------------------------------------------------------------------------------------------------------------------------------------------|-----------------------------------------------|----------------------------------------------------------------------------------------------------------------------|
| <p><b>QUESTION:</b><br/>Holidays have finished. Thanks to the help of the hacker Leha, Noora managed to enter the university of her dreams which is located in a town Pavlopolis. It's well known that universities provide students with dormitory for the period of university studies. Consequently Noora had to leave Vičkopolis and move to Pavlopolis. Thus Leha was left completely alone in a quiet town Vičkopolis. He almost even fell into a depression from boredom!</p> <p>Leha came up with a task for himself to relax a little. He chooses two integers A and B and then calculates the greatest common divisor of integers "A factorial" and "B factorial". Formally the hacker wants to find out <math>GCD(A!, B!)</math>. It's well known that the factorial of an integer x is a product of all positive integers less than or equal to x. Thus <math>x! = 1 \cdot 2 \cdot 3 \cdot \dots \cdot (x - 1) \cdot x</math>. For example <math>4! = 1 \cdot 2 \cdot 3 \cdot 4 = 24</math>. Recall that <math>GCD(x, y)</math> is the largest positive integer q that divides (without a remainder) both x and y.</p> <p>Leha has learned how to solve this task very effective. You are able to cope with it not worse, aren't you?</p> <p>-----Input-----</p> <p>The first and single line contains two integers A and B (<math>1 \leq A, B \leq 10^9</math>, <math>\min(A, B) \leq 12</math>).</p> <p>-----Output-----</p> <p>Print a single integer denoting the greatest common divisor of integers A! and B!.</p> <p>-----Example-----</p> <p>Input<br/>4 3</p> <p>Output<br/>6</p> <p>-----Note-----</p> <p>Consider the sample.</p> <p><math>4! = 1 \cdot 2 \cdot 3 \cdot 4 = 24</math>. <math>3! = 1 \cdot 2 \cdot 3 = 6</math>. The greatest common divisor of integers 24 and 6 is exactly 6.<br/>Use Standard Input format</p> <p>ANSWER:</p> | <p><b>Input:</b> 4 3<br/><b>Output:</b> 6</p> | <p><b>Input:</b> 10 399603090<br/><b>Output:</b> 3628800</p> <p><b>Input:</b> 5 5<br/><b>Output:</b> 120<br/>...</p> |
| <b>Ground-truth Program</b>                                                                                                                                                                                                                                                                                                                                                                                                                                                                                                                                                                                                                                                                                                                                                                                                                                                                                                                                                                                                                                                                                                                                                                                                                                                                                                                                                                                                                                                                                                                                                                                                                                                                                                                                                                                                                                            |                                               |                                                                                                                      |
| <pre>1 a, b = map(int, input().split()) 2 a = min(a, b) 3 ans = 1 4 for i in range(1, a + 1): 5     ans *= i 6 print(ans)</pre>                                                                                                                                                                                                                                                                                                                                                                                                                                                                                                                                                                                                                                                                                                                                                                                                                                                                                                                                                                                                                                                                                                                                                                                                                                                                                                                                                                                                                                                                                                                                                                                                                                                                                                                                        |                                               |                                                                                                                      |
| <b>CodeT5 Output Program</b>                                                                                                                                                                                                                                                                                                                                                                                                                                                                                                                                                                                                                                                                                                                                                                                                                                                                                                                                                                                                                                                                                                                                                                                                                                                                                                                                                                                                                                                                                                                                                                                                                                                                                                                                                                                                                                           |                                               |                                                                                                                      |
| <pre>1 from math import gcd 2 a, b = map(int, input().split()) 3 c = math.gcd(a,b) 4 print(c)</pre>                                                                                                                                                                                                                                                                                                                                                                                                                                                                                                                                                                                                                                                                                                                                                                                                                                                                                                                                                                                                                                                                                                                                                                                                                                                                                                                                                                                                                                                                                                                                                                                                                                                                                                                                                                    |                                               |                                                                                                                      |
| <p><b>Example tests: Failed</b><br/><b>Hidden tests: Failed</b></p>                                                                                                                                                                                                                                                                                                                                                                                                                                                                                                                                                                                                                                                                                                                                                                                                                                                                                                                                                                                                                                                                                                                                                                                                                                                                                                                                                                                                                                                                                                                                                                                                                                                                                                                                                                                                    |                                               |                                                                                                                      |
| <b>CodeRL+CodeT5 Output Program (before CS)</b>                                                                                                                                                                                                                                                                                                                                                                                                                                                                                                                                                                                                                                                                                                                                                                                                                                                                                                                                                                                                                                                                                                                                                                                                                                                                                                                                                                                                                                                                                                                                                                                                                                                                                                                                                                                                                        |                                               |                                                                                                                      |
| <pre>1 from math import gcd 2 a, b = list(map(int, input().split())) 3 gcd = lambda x, y: x if y == 0 else gcd(y, x % y) 4 5 a_prod = 1 6 b_prod = 1 7 for i in range(1, a + 1): 8     a_prod *= i 9 for i in range(1, b + 1): 10    b_prod *= i 11 12 print(gcd(a_prod, b_prod))</pre>                                                                                                                                                                                                                                                                                                                                                                                                                                                                                                                                                                                                                                                                                                                                                                                                                                                                                                                                                                                                                                                                                                                                                                                                                                                                                                                                                                                                                                                                                                                                                                                |                                               |                                                                                                                      |
| <p><b>Example tests: Passed</b><br/><b>Hidden tests: RuntimeError (TimeOut)</b></p>                                                                                                                                                                                                                                                                                                                                                                                                                                                                                                                                                                                                                                                                                                                                                                                                                                                                                                                                                                                                                                                                                                                                                                                                                                                                                                                                                                                                                                                                                                                                                                                                                                                                                                                                                                                    |                                               |                                                                                                                      |
| <b>CodeRL+CodeT5 Output Program (after CS)</b>                                                                                                                                                                                                                                                                                                                                                                                                                                                                                                                                                                                                                                                                                                                                                                                                                                                                                                                                                                                                                                                                                                                                                                                                                                                                                                                                                                                                                                                                                                                                                                                                                                                                                                                                                                                                                         |                                               |                                                                                                                      |
| <pre>1 from math import gcd 2 a, b = list(map(int, input().split())) 3 gcd = lambda x, y: x if y == 0 else gcd(y, x % y) 4 5 a_prod = 1 6 b_prod = 1 7 for i in range(1, min(a, b) + 1): 8     a_prod *= i 9     b_prod *= i 10 11 print(gcd(a_prod, b_prod))</pre>                                                                                                                                                                                                                                                                                                                                                                                                                                                                                                                                                                                                                                                                                                                                                                                                                                                                                                                                                                                                                                                                                                                                                                                                                                                                                                                                                                                                                                                                                                                                                                                                    |                                               |                                                                                                                      |
| <p><b>Example tests: Passed</b><br/><b>Hidden tests: Passed</b></p>                                                                                                                                                                                                                                                                                                                                                                                                                                                                                                                                                                                                                                                                                                                                                                                                                                                                                                                                                                                                                                                                                                                                                                                                                                                                                                                                                                                                                                                                                                                                                                                                                                                                                                                                                                                                    |                                               |                                                                                                                      |

Figure 8: **An example interview-level APPS programming task and programs generated by CodeT5 variants:** The program generated by CodeT5 model fails all unit tests while CodeRL+CodeT5 (without CS generation) can generate a functionally correct program. However, this program leads to runtime errors in extreme test cases. After applying the CS generation procedure, the program is improved and able to pass all hidden unit tests.
